# Supplementary material for: GLP-1 Increases Circulating Leptin Levels in Truncal Vagotomized Rats
Source: MDPI journal article supplement (doi:10.3390/biomedicines11051322), 2023-04-28
Supplement: s1 [file s1]

**Table S1. Study subjects' anthropometric, clinical and biochemical features.**

|                                 | <b>Ob+NGT<br/>(n = 5)</b> | <b>Ob+Pre-T2D<br/>(n = 5)</b> | <b>Ob+T2D<br/>(n = 5)</b> | <b>Non-Ob<br/>(n = 4)</b> |
|---------------------------------|---------------------------|-------------------------------|---------------------------|---------------------------|
| Age (years)                     | 44 ± 7                    | 50 ± 3                        | 56 ± 2                    | 48 ± 7                    |
| Sex (F%)                        | 80%                       | 80%                           | 80%                       | 50%                       |
| BMI (kg/m <sup>2</sup> )        | 41.4 ± 2.6 ***            | 44.0 ± 2.8 ***                | 41.5 ± 2.5 ***            | 26.1 ± 1.0                |
| Fasting<br>glucose<br>(mg/dL)   | 93.8 ± 0.8                | 109.2 ± 8.0                   | 161.4 ± 26.8 *,†          | 88.8 ± 3.2                |
| HbA1c (%)                       | 5.4 ± 0.2                 | 6.2 ± 0.2                     | 7.6 ± 1.3 †               | n.a.                      |
| Metformin (%)                   | 0%                        | 0%                            | 100%                      | 0%                        |
| SBP (mmHg)                      | 137 ± 7                   | 150 ± 6                       | 146 ± 4                   | 133 ± 7                   |
| DBP (mmHg)                      | 79 ± 4                    | 85 ± 3                        | 73 ± 4                    | 80 ± 4                    |
| Total<br>cholesterol<br>(mg/dL) | 161 ± 7                   | 220 ± 15                      | 206 ± 24                  | 177 ± 25                  |
| HDL (mg/dL)                     | 52 ± 5                    | 47 ± 7                        | 48 ± 5                    | 35 ± 11                   |
| LDL (mg/dL)                     | 96.4 ± 10.3               | 142.4 ± 7.2                   | 135.4 ± 23.2              | 100.9 ± 6.7               |
| Triglycerides<br>(mg/dL)        | 102 ± 8                   | 111 ± 22                      | 203 ± 49                  | 206 ± 147                 |

Subjects were grouped according to body mass index (BMI) and glycemic status (with obesity and euglycemia—Ob+NGT; with obesity and pre-diabetes—Ob+Pre-T2D; with obesity and T2D—Ob+T2D; without obesity—Non-Ob). HbA1c—hemoglobin A1c; SBP—systolic blood pressure; DBP—diastolic blood pressure; HDL—high-density lipoprotein; LDL—low-density lipoprotein. Data are presented as mean ± SEM. \* vs. Non-Ob (\*, p < 0.05; \*\*\*, p < 0.001); † vs. Ob+NGT (†, p < 0.05).
