# Supplementary material for: GLP-1 Increases Circulating Leptin Levels in Truncal Vagotomized Rats
Source: MDPI journal article supplement (doi:10.3390/biomedicines11051322), 2023-04-28
Supplement: s1 [file s1]

**Table S2.** Comparison of hypothalamic gene expression of NPY/AgRP and POMC/CART on sham- and vagotomised rats 90 minutes after Saline or GLP-1 administration.

|              | Sham-Vagotomised |             | Vagotomised  |             |
|--------------|------------------|-------------|--------------|-------------|
|              | Saline (n=6)     | GLP-1 (n=6) | Saline (n=5) | GLP-1 (n=5) |
| <b>NPY</b>   | 1.00±0.11        | 1.02±0.14   | 1.51±0.25    | 1.51±0.25   |
| <b>AgRP</b>  | 1.00±0.33        | 1.15±0.39   | 0.75±0.67    | 0.61±0.39   |
| <b>POMC</b>  | 1.00±0.22        | 1.13±0.40   | 0.93±0.45    | 1.04±0.38   |
| <b>CART</b>  | 1.00±0.38        | 1.02±0.35   | 1.40±0.44    | 0.96±0.30   |
| <b>UCP-1</b> | 1.00±0.24        | 0.86±0.19   | 0.52±0.15    | 0.87±0.29   |
